# Supplementary material
Source: ML conference proceedings conference paper supplement (https://openreview.net/forum?id=6zcfrSz98y)
Supplement: supplementary_material [file attachment]

---

# Supplementary Materials for the XAI Benchmark $\mathcal{M}^4$

---

## 1 Detailed Results

2 **Numerical Results.** In Table 1, we present numerical results demonstrating different feature attribution approach for image classification tasks. For future work, we aim to expand our analyses by  
3 incorporating additional methods and models, and even different data modalities such as graphs,  
4 audio, and video. There are several perspectives from which to analyze these benchmark results,  
5 making comprehensive exploration challenging. Advanced statistical techniques may yield further  
6 insights in future work.

7 **Separate Results of Metrics.** In Section 3.2 of the main text, we showed the averaged metric scores  
8 with respect to models and attribution methods for image classification task. Here we present the  
9 detailed scores of each metric for images in Figure 1 and texts in Figure 2.

10 **Finetuning Details of NLP Models on MovieReview.** Language models are all pretrained on large  
11 text corpus and yet not specified on downstream tasks. It is thus required to do the finetuning step  
12 on MovieReview to adapt the pretrained language model on the sentiment analysis task for better  
13 performance. The finetuning details are described as follows:

- 14 • Batch Size: 32
- 15 • Learning Rate: 3e-5
- 16 • Optimizer: AdamW
- 17 • Epochs: 10
- 18 • Max Sequence Length: 300 for Bert/L, 512 for others.

19 **Training Details on Synthetic Dataset.** We briefly recall the background. The idea with the synthetic  
20 dataset is that the synthetic patches on the images serve as supervision signals for training models.  
21 Labels of the images with synthetic patches will be reversed. These patches constitute explanation  
22 ground truths because no other patterns can lead to correct predictions by design. Therefore, models  
23 trained on such datasets must attribute their predictions to the synthetic ground truths. A subset of  
24 ImageNet training set with 10K images is used for training, and a subset of ImageNet validation  
25 set with 5K images is used for evaluation. During training, yellow patches of fixed size  $60 \times 60$  and  
26 random positions in the image are added with probability of 50% to training images. Images with  
27 yellow patches are labeled as 1, others are labeled as 0. Without much tuning, we apply almost  
28 the same setting for training each model, with only changing the learning rate. Specifically, the  
29 hyperparameter details are as follows:

- 30 • Batch Size: 64
- 31 • Optimizer: AdamW
- 32 • Epochs: 3
- 33 • Learning Rate: 0.1 for MobileNet, 0.01 for ResNet family, 0.001 for ViTs and VGG16.

Table 1: Detailed Results for all pairs of models and attribution methods.

| model     | it      | MoRF   | ABPC   | Pscore | INFD     | SynScore |
|-----------|---------|--------|--------|--------|----------|----------|
| R50       | GradCAM | 0.6283 | 0.4243 | 0.8354 | 2.4959   | 0.9997   |
| R50       | IG      | 0.7093 | 0.3772 | 0.8117 | 2.3734   | 0.9990   |
| R50       | SG      | 0.7005 | 0.3687 | 0.8204 | 2.3234   | 0.9983   |
| R101      | GradCAM | 0.6488 | 0.4471 | 0.8381 | 3.1395   | 0.9692   |
| R101      | IG      | 0.7291 | 0.3920 | 0.8056 | 3.0128   | 0.9954   |
| R101      | SG      | 0.7202 | 0.3746 | 0.8188 | 2.9634   | 0.9651   |
| R152      | GradCAM | 0.6481 | 0.4606 | 0.8380 | 2.9718   | 0.9872   |
| R152      | IG      | 0.7302 | 0.4042 | 0.8005 | 2.8786   | 0.9983   |
| R152      | SG      | 0.7170 | 0.3767 | 0.8046 | 2.8487   | 0.9848   |
| MobileNet | GradCAM | 0.5892 | 0.3335 | 0.7828 | 1.4315   | 0.9923   |
| MobileNet | IG      | 0.7214 | 0.2993 | 0.7727 | 1.2611   | 0.9843   |
| MobileNet | SG      | 0.7134 | 0.2924 | 0.7988 | 1.2277   | 0.9598   |
| VGG16     | GradCAM | 0.5263 | 0.1942 | 0.5586 | 208.3502 | 0.9777   |
| VGG16     | IG      | 0.8610 | 0.3731 | 0.7871 | 58.2901  | 0.9935   |
| VGG16     | SG      | 0.8515 | 0.3579 | 0.8151 | 58.8416  | 0.9235   |
| ViT/B     | BT/H    | 0.6789 | 0.3643 | 0.8745 | 1.0845   | 0.9238   |
| ViT/B     | BT/T    | 0.6770 | 0.3610 | 0.8687 | 1.0971   | 0.9247   |
| ViT/B     | GA      | 0.6672 | 0.3203 | 0.7242 | 1.0539   | 0.9631   |
| ViT/B     | IG      | 0.6946 | 0.3620 | 0.7740 | 1.1642   | 0.8480   |
| ViT/B     | SG      | 0.7038 | 0.3419 | 0.7894 | 1.1190   | 0.8537   |
| ViT/L     | BT/H    | 0.6863 | 0.3299 | 0.8233 | 1.2060   | 0.8622   |
| ViT/L     | BT/T    | 0.6884 | 0.3318 | 0.8593 | 1.2098   | 0.8535   |
| ViT/L     | GA      | 0.6614 | 0.2596 | 0.6829 | 1.2542   | 0.9199   |
| ViT/L     | IG      | 0.6902 | 0.3748 | 0.7425 | 1.2421   | 0.8792   |
| ViT/L     | SG      | 0.6908 | 0.3254 | 0.7443 | 1.2055   | 0.8509   |
| ViT/S     | BT/H    | 0.6048 | 0.4115 | 0.8855 | 0.4338   | 0.8658   |
| ViT/S     | BT/T    | 0.6045 | 0.4095 | 0.8790 | 0.4391   | 0.9147   |
| ViT/S     | GA      | 0.5907 | 0.3571 | 0.7567 | 0.4360   | 0.9942   |
| ViT/S     | IG      | 0.6291 | 0.3305 | 0.7824 | 0.4650   | 0.8059   |
| ViT/S     | SG      | 0.6246 | 0.3131 | 0.8183 | 0.4491   | 0.7160   |
| ViT/MAE   | BT/H    | 0.5865 | 0.3683 | 0.9363 | 0.1570   | 0.9821   |
| ViT/MAE   | BT/T    | 0.5869 | 0.3688 | 0.9340 | 0.1574   | 0.9756   |
| ViT/MAE   | GA      | 0.5335 | 0.2761 | 0.8884 | 0.1788   | 0.7088   |
| ViT/MAE   | IG      | 0.5590 | 0.2763 | 0.7543 | 0.1624   | 0.8361   |
| ViT/MAE   | SG      | 0.5758 | 0.3063 | 0.8028 | 0.1581   | 0.7689   |

## 2 Gradient-based Attribution Methods on Vision Transformers

As discussed in the main text, gradient-based explanations can be noisy for Vision Transformers [1]. Here we also show the visualization results of IG and SG. The results show the clear boundaries of patches. This may be caused by back-propagation through the patch embedding layer.

## 3 Computation Cost

We also report the time cost for performing the computation of explanations. See Table 2 for the results. Note that the implementation for each method is not optimized. Moreover, for modular designs, the core calculation of the attribution algorithm is done with CPU parallelization. Nevertheless, we can still notice that the GA and GradCAM are performed very fast, finishing 100 examples in several seconds, while others can be completed in several to twenty minutes.

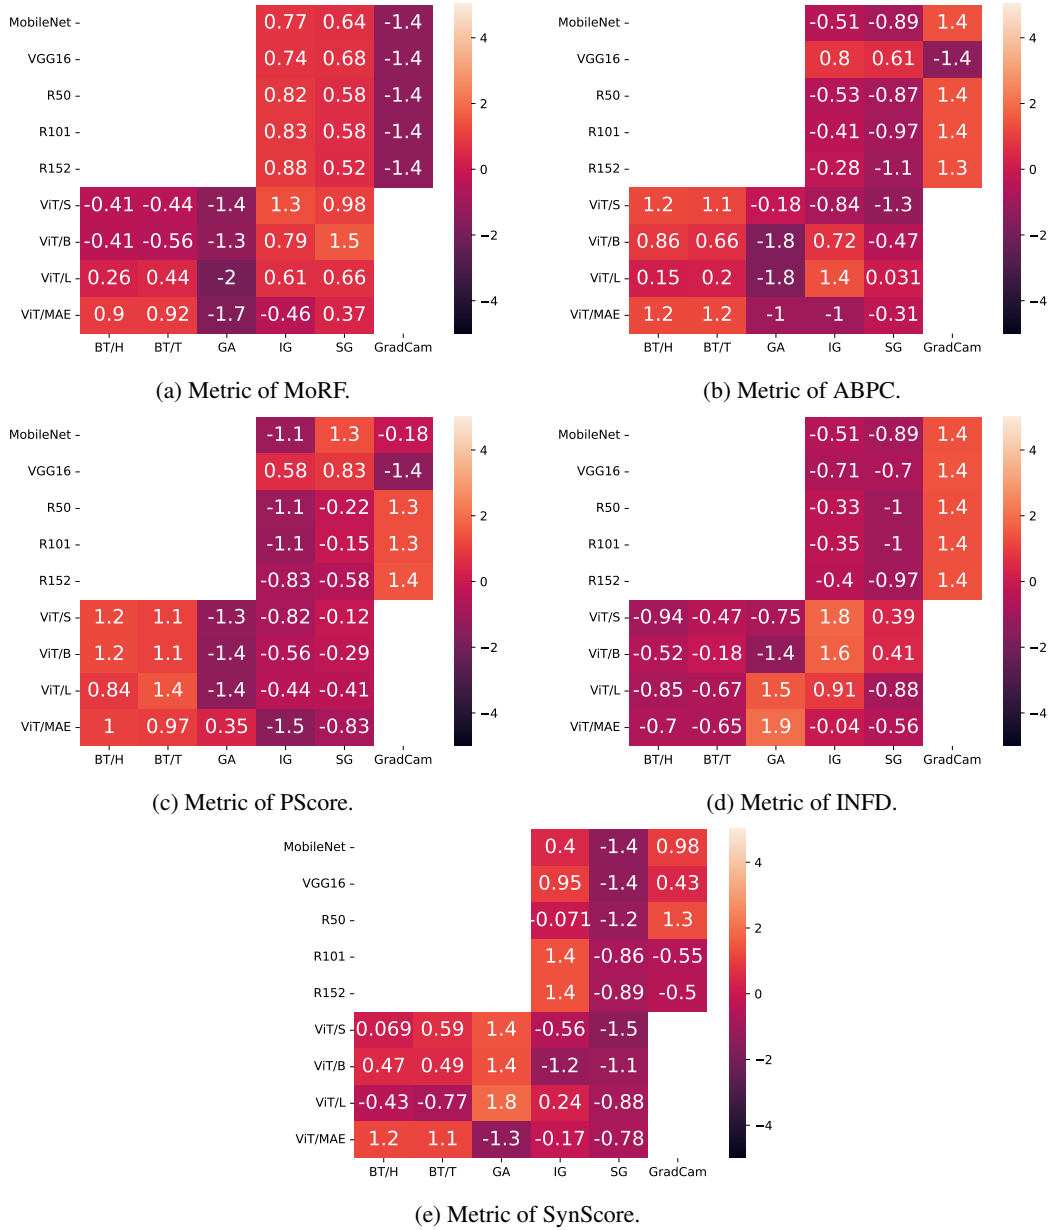

Figure 1: Averaged metric scores. A higher value indicates better faithfulness. The blanks indicate that the algorithm in a vanilla style is not suitable for the model.

## 4 Visualization

Some visualization examples can be found in <https://github.com/PaddlePaddle/InterpretDL/tree/master/examples>, and more examples can be easily computed.

## References

- [1] Ameen Ali, Thomas Schnake, Oliver Eberle, Grégoire Montavon, Klaus-Robert Müller, and Lior Wolf. Xai for transformers: Better explanations through conservative propagation. In *International Conference on Machine Learning*, pages 435–451. PMLR, 2022.

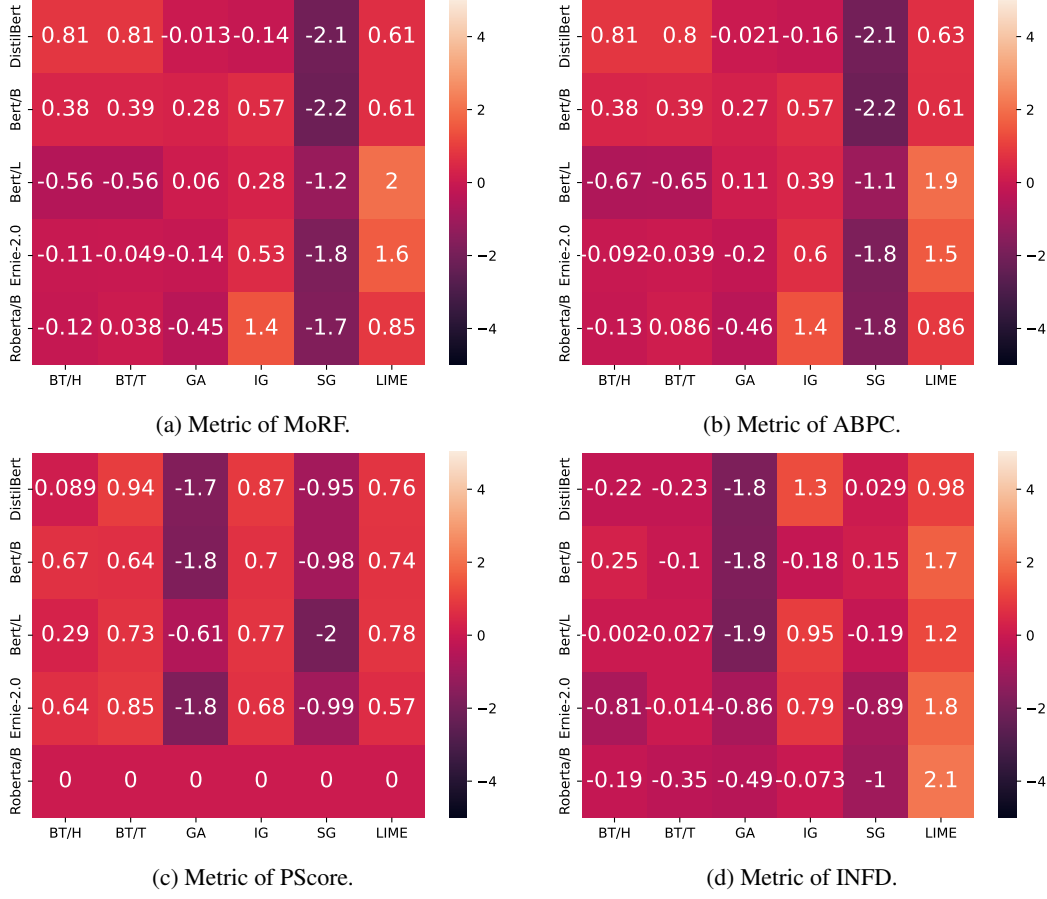

Figure 2: Averaged metric scores. A higher value indicates better faithfulness. The blanks indicate that the algorithm in a vanilla style is not suitable for the model.

Table 2: Time cost for computing the explanation result given all pairs of models and attribution methods. Note that the time cost is recorded after computing the explanations of 100 examples.

|           | BT/H   | BT/T   | GA  | SG     | IG     | GradCAM |
|-----------|--------|--------|-----|--------|--------|---------|
| R50       |        |        |     | 7m50s  | 6m32s  | 5s      |
| R101      |        |        |     | 12m06s | 10m49s | 10s     |
| R152      |        |        |     | 16m58s | 15m42s | 14s     |
| MobileNet |        |        |     | 7m01s  | 5m49s  | 6s      |
| VGG16     |        |        |     | 5m27s  | 3m49s  | 5s      |
| ViT/S     | 1m52s  | 1m53s  | 5s  | 5m46s  | 4m28s  |         |
| ViT/B     | 2m59s  | 2m39s  | 7s  | 6m31s  | 7m16s  |         |
| ViT/L     | 10m30s | 10m01s | 14s | 13m08s | 15m07s |         |
| ViT/MAE   | 3m40s  | 3m39s  | 8s  | 6m59s  | 7m20s  |         |

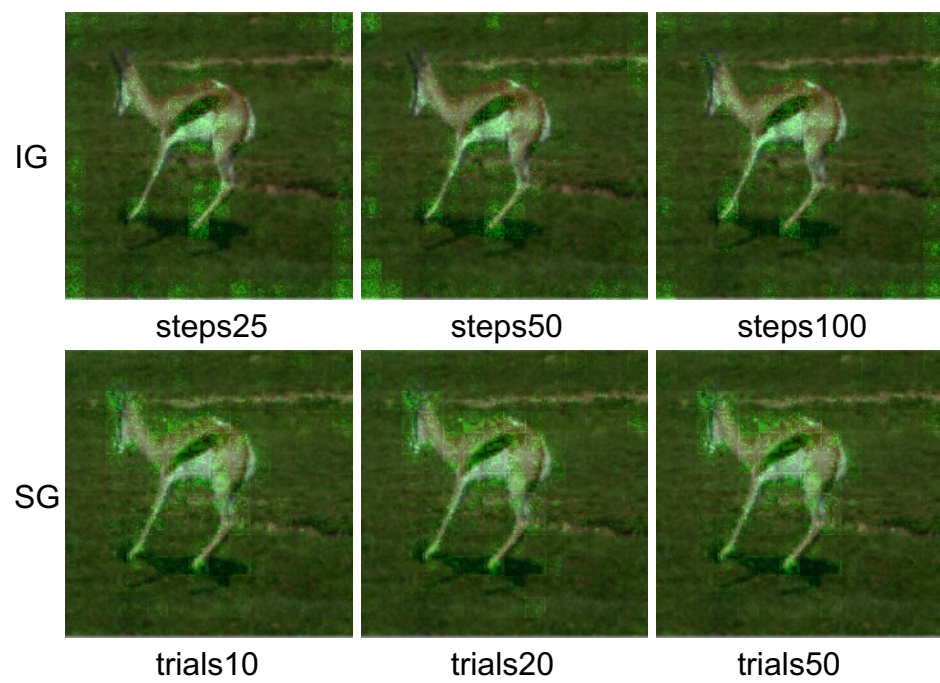

Figure 3: Visualization results of IG and SG.
